# Supplementary material for: Structure advantage and peroxidase activity enhancement of deuterohemin-peptide–inorganic hybrid flowers
Source: Royal Society of Chemistry journal article supplement (doi:10.1039/c6ra24192a), 2016-01-01
Supplement: c6ra24192a1.pdf [file c6ra24192a1.pdf]

## Supplementary Information

### Structure advantage and peroxidase activity enhancement of deuterohemin-peptide-inorganic hybrid flowers

Zijian Zhao,<sup>ab</sup> Ji Zhang,<sup>b</sup> Mingyang Wang,<sup>c</sup> Zhi Wang,<sup>b</sup> Liping Wang,<sup>c</sup> Li Ma,<sup>\*bd</sup> Xuri Huang,<sup>\*a</sup> and Zhengqiang Li<sup>\*b</sup>

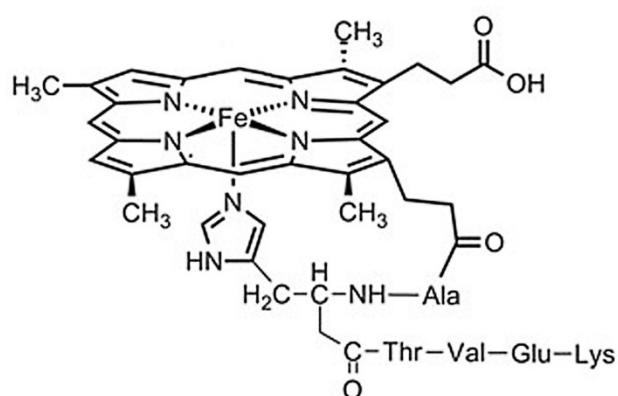

**Fig. S1** The structure of DhHP-6 with molecule weight of 1128.

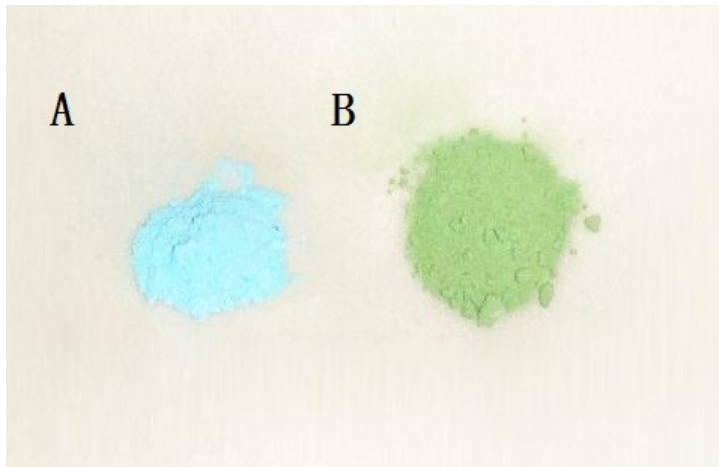

**Fig. S2** Powder photographs of (A)  $\text{Cu}_3(\text{PO}_4)_2$  (left, blue precipitate) and (B) DhHP-6- $\text{Cu}_3(\text{PO}_4)_2$  hybrid flowers (right, green precipitate), prepared with and without DhHP-6 respectively.

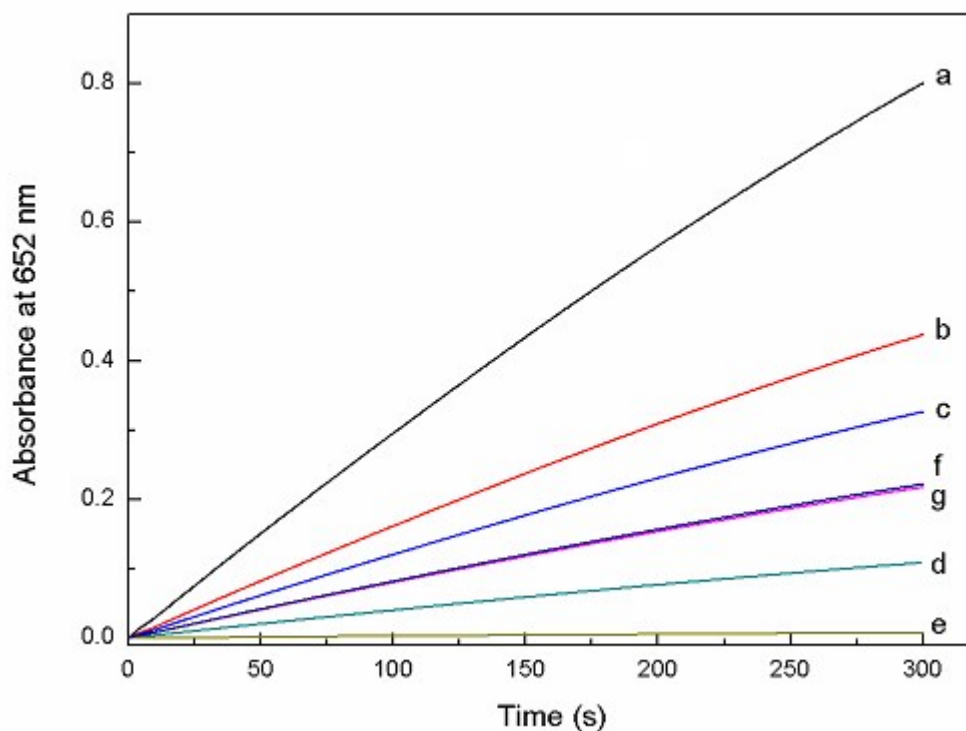

**Fig. S3** Absorbance of oxidized TMB (652 nm) as a function of time in catalytic reactions of DhHP-6- $\text{Cu}_3(\text{PO}_4)_2$  prepared from starting concentrations of DhHP-6 at (a)  $0.006 \text{ mg mL}^{-1}$ ; (b)  $0.012 \text{ mg mL}^{-1}$ ; (c)  $0.024 \text{ mg mL}^{-1}$ ; (d)  $0.06 \text{ mg mL}^{-1}$ ; (e)  $0 \text{ mg mL}^{-1}$ ; (f) free DhHP-6; (g) free DhHP-6 and  $\text{Cu}_3(\text{PO}_4)_2$ . Experimental conditions: (a) - (d) and (f) - (g) at equivalent amount of DhHP-6 ( $3.8 \mu\text{g}$ ). The  $1 \text{ mL}$  reaction mixture contained  $0.8 \text{ mM}$  TMB and  $2 \text{ mM}$   $\text{H}_2\text{O}_2$  at  $\text{pH } 6.0$ ,  $35^\circ\text{C}$ .

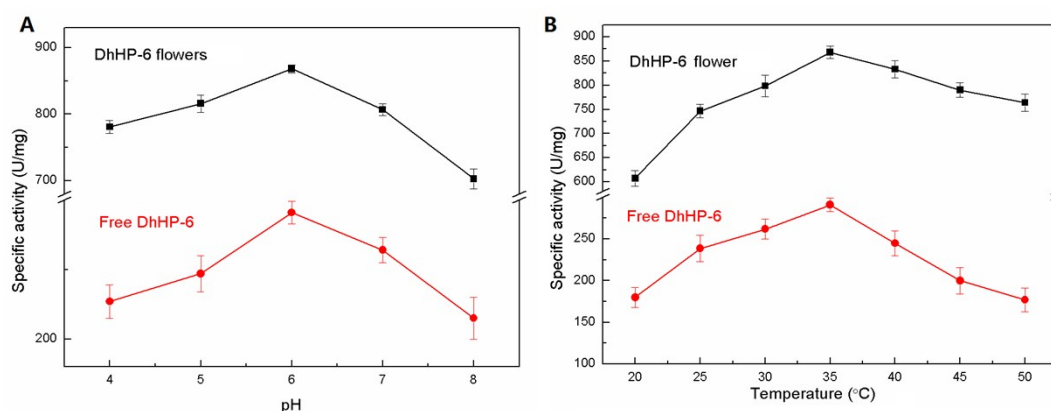

**Fig. S4** Peroxidase-like activity of DhHP-6- $\text{Cu}_3(\text{PO}_4)_2$  flowers (black) and free DhHP-6 (red) as a function of (A)  $\text{pH}$  at temperature  $35^\circ\text{C}$  and (B) temperature at  $\text{pH } 6.0$ . One unit specific activity ( $\text{U/mg}$ ) of DhHP-6- $\text{Cu}_3(\text{PO}_4)_2$  flowers or free DhHP-6 is defined as  $1 \text{ mg}$  of DhHP-6 that catalyzes  $1.0 \mu\text{mol}$  of  $\text{H}_2\text{O}_2$  per minute.

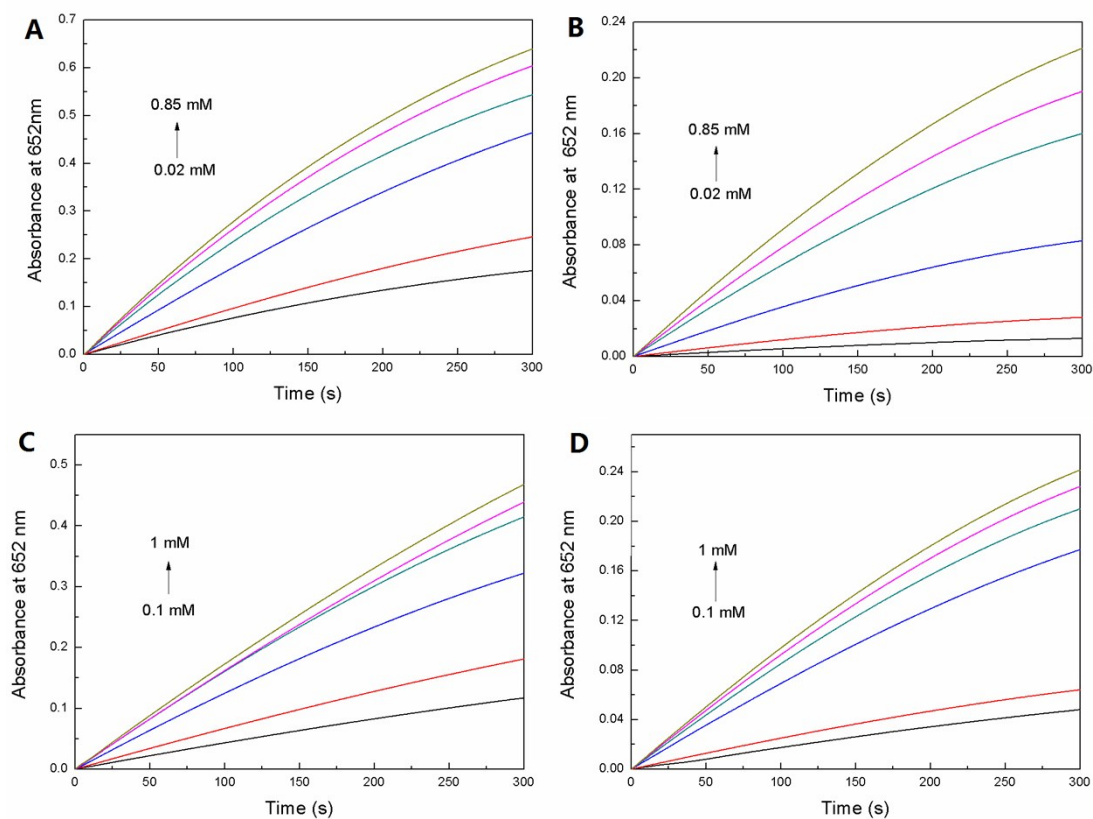

**Fig. S5** Time-dependent absorbance changes of the absorbance at 652nm with different concentrations of substrates. Conditions: (A)  $\text{H}_2\text{O}_2$  (2 mM) and 100  $\mu\text{g}$  DhHP-6- $\text{Cu}_3(\text{PO}_4)_2$  flowers with different concentration of TMB (0.02 mM-0.85 mM ) in 1mL PBS (pH 6.0); (B)  $\text{H}_2\text{O}_2$  (2 mM) and 3.8  $\mu\text{g}$  DhHP-6 with different concentration of TMB (0.02 mM-0.85 mM ) in 1 mL PBS (pH 6.0); (C) TMB (0.8 mM) and 100  $\mu\text{g}$  DhHP-6- $\text{Cu}_3(\text{PO}_4)_2$  with different concentration of  $\text{H}_2\text{O}_2$  (0.1 Mm-1.0 mM ) in 1 mL PBS (pH 6.0); (D) TMB (0.8 mM) and 3.8  $\mu\text{g}$  DhHP-6 with different concentration of  $\text{H}_2\text{O}_2$  (0.1 mM-1.0 mM ) in 1 mL PBS (pH 6.0).

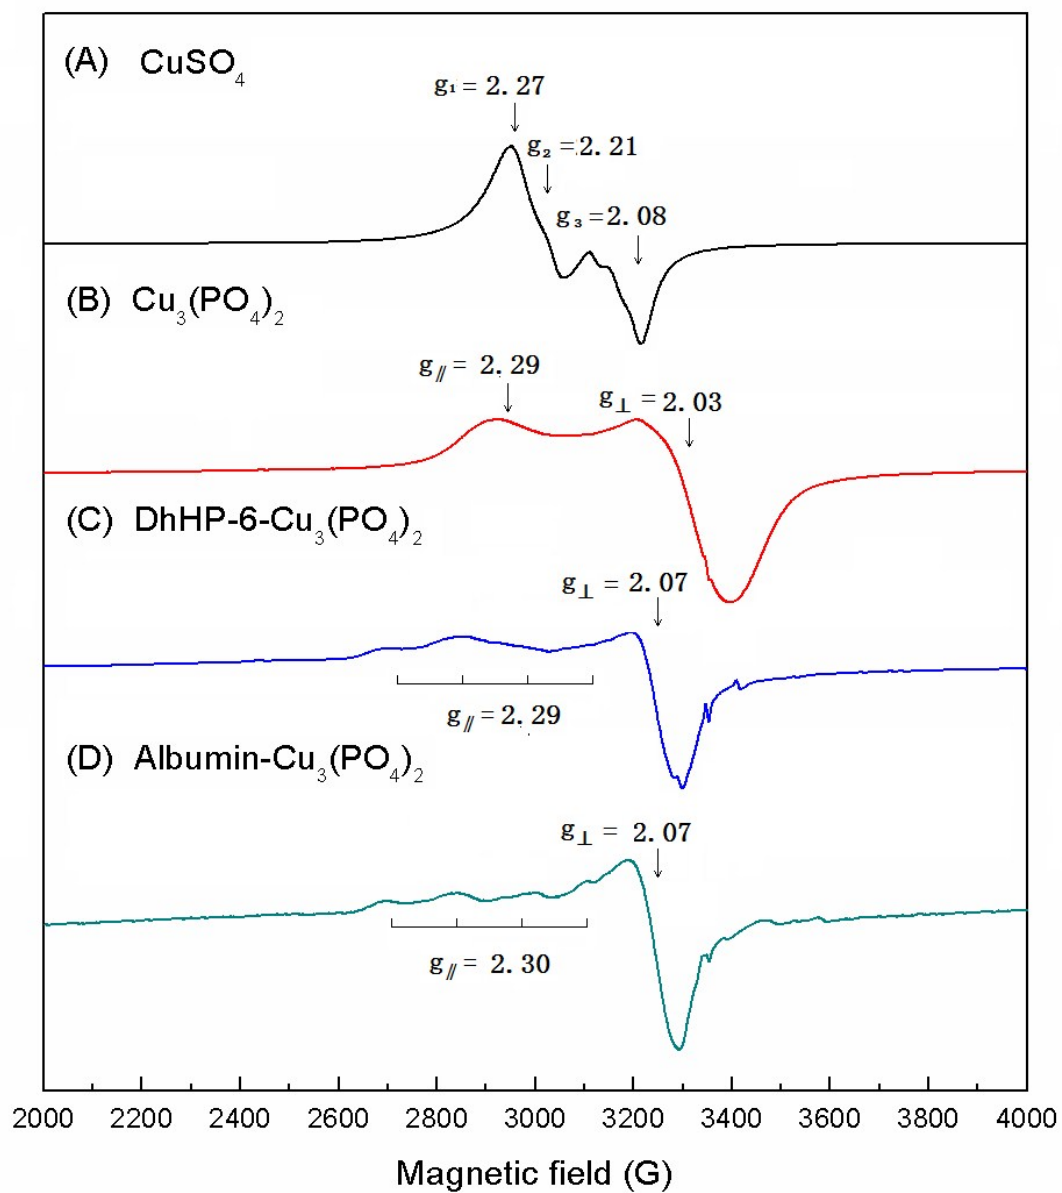

**Fig. S6** EPR spectra of (A)  $\text{CuSO}_4$ , (B)  $\text{Cu}_3(\text{PO}_4)_2$ , (C) DhHP-6- $\text{Cu}_3(\text{PO}_4)_2$  flowers and (D) Albumin- $\text{Cu}_3(\text{PO}_4)_2$  at room temperature.

**Table. S1** From left columns 1 - 3: calculated initial DhHP-6 concentrations, measured actual starting concentrations and unreacted concentrations of DhHP-6 determined from absorbance at 389 nm ( $\varepsilon = 54520 \text{ M}^{-1} \text{ cm}^{-1}$ ) columns 4 -5: Encapsulation yield (defined as the ratio of the amount of immobilized DhHP-6 to the total amount of DhHP-6 employed in percentage) and weight percentage of DhHP-6 in the flowers. The weight percentage of protein in flowers was calculated according to the ref. 1. The specific activity of free DhHP-6 is 291 U/mg in PBS and 284 U/mg in PBS with physically mixed  $\text{Cu}_3(\text{PO}_4)_2$ .

| Targeted | DhHP-6 concentration<br>(mg mL <sup>-1</sup> ) |           | Encapsulation<br>yield<br>(%) | Weight<br>percentage<br>(%) | Specific<br>activity<br>(U/mg) |
|----------|------------------------------------------------|-----------|-------------------------------|-----------------------------|--------------------------------|
|          | Actual                                         | Unreacted |                               |                             |                                |
| 0.006    | 0.00589                                        | 0.00118   | 79.97                         | 3.78                        | 867.2                          |
| 0.012    | 0.0118                                         | 0.00291   | 75.29                         | 6.95                        | 584.9                          |
| 0.024    | 0.0237                                         | 0.00953   | 59.72                         | 10.85                       | 436.5                          |
| 0.060    | 0.0589                                         | 0.0296    | 49.74                         | 18.75                       | 122.2                          |

## Reference

1 J. Ge, J. Lei and R. N. Zare, *Nat. Nanotechnol.*, 2012, **7**, 428-432.
